# Supplementary material
Source: MDPI journal article supplement (https://www.mdpi.com/2073-4433/15/3/323)
Supplement: s1 [file s1 › atmosphere-2872849-supplementary.pdf]

## Supplementary Materials

**Table S1.** Summary of abbreviations.

|                   |                                                                       |
|-------------------|-----------------------------------------------------------------------|
| Mp                | A general term for the predictor variables used in this paper         |
| ML                | Machine learning                                                      |
| CV                | Cross-validation                                                      |
| ACEs              | Anthropogenic CO <sub>2</sub> emissions                               |
| IS                | Impervious surface                                                    |
| NL                | Nighttime lighting                                                    |
| RN                | Density of the road network for transportation                        |
| ERA5              | Fifth-generation atmospheric reanalysis dataset                       |
| V10               | 10m north–south wind speed                                            |
| U10               | 10m east–west wind speed                                              |
| D2M               | Dew point temperature                                                 |
| T2M               | 2m temperature                                                        |
| dXCO <sub>2</sub> | Difference between CO <sub>2</sub> concentration and background value |

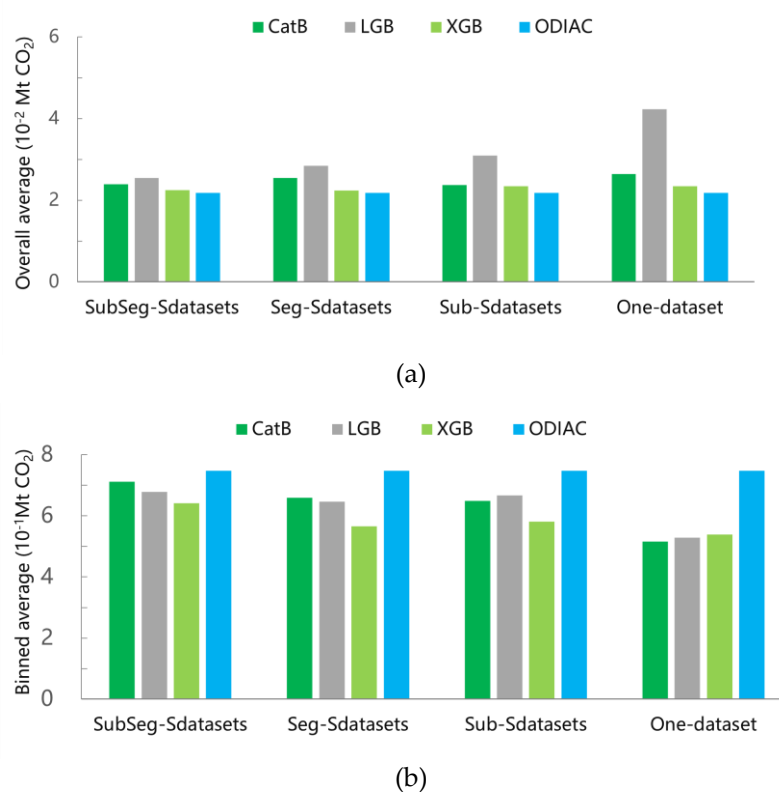

**Figure S1.** Comparison of average predicted ACEs in 2021 based on the four training datasets (Sub-Seg-Sdatasets, Seg-Sdatasets, Sub-Sdatasets, One-Sdataset) combined with three ML algorithms (CatB, LGB, XGB) and ODIAC in the study area, where (a) is the overall mean of predicted ACEs and ODIAC in 2021, (b) is averaged ACEs for ODIAC values ranging from 0.6–0.8 MtCO<sub>2</sub>.

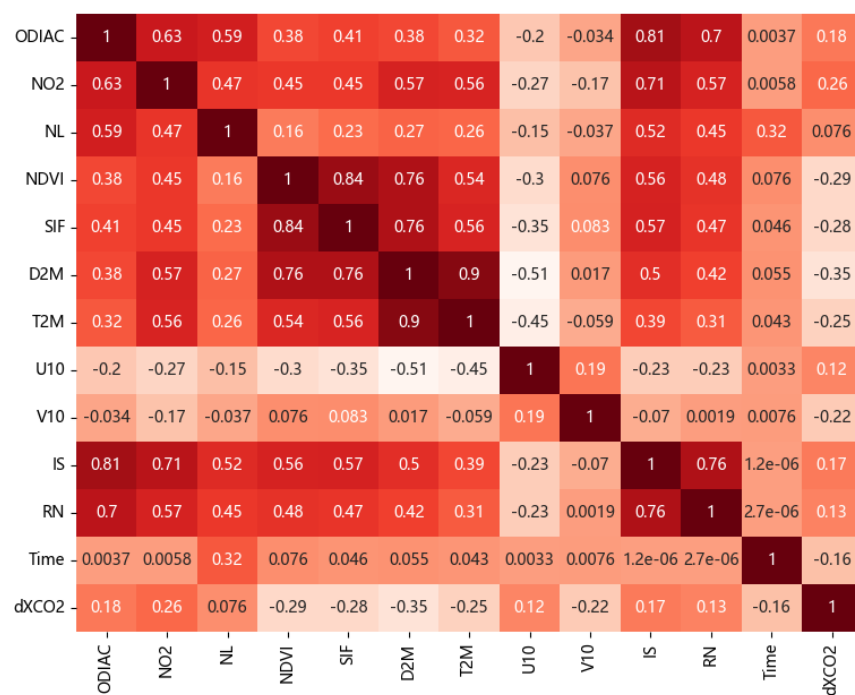

**Figure S2.** Heat map of the correlations among variables.
